# Supplementary material
Source: PubMed Central journal article supplement (PMC3271134)
Supplement: NIHMS343815-supplement-9.pdf [file NIHMS343815-supplement-9.pdf]

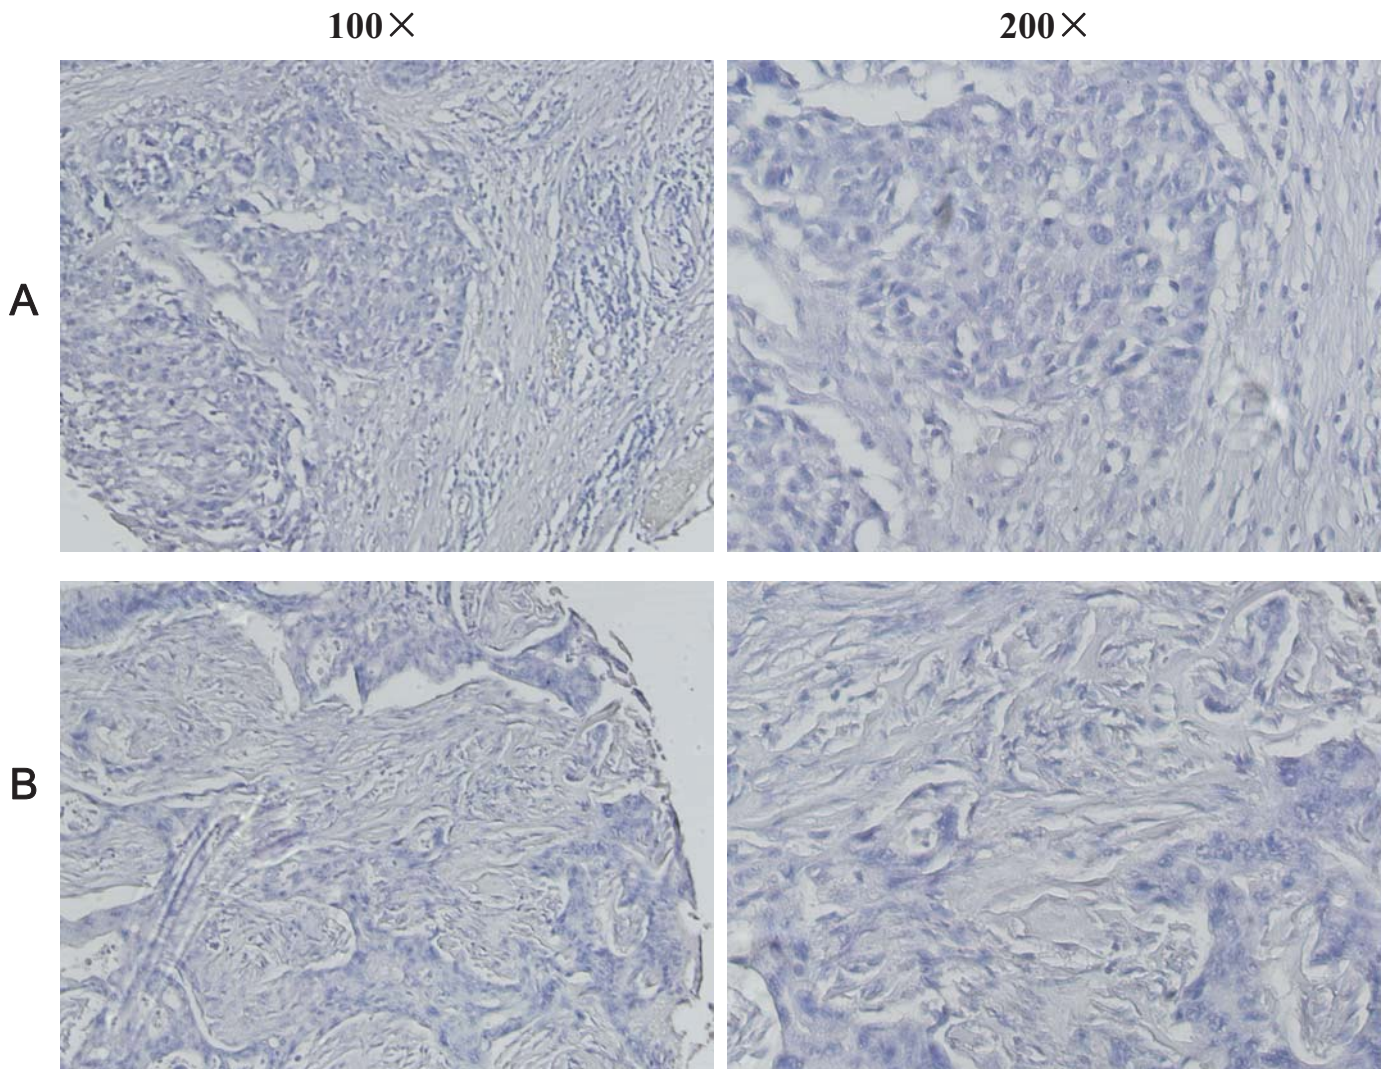

**Supplementary Fig. 1.** IHC in pancreatic cancer tissue. Representative photos of negative IgG control were shown at both lower and higher magnifications, respectively. **A** and **B** were the negative IgG control staining for Cav-1 and FoxM1, respectively.

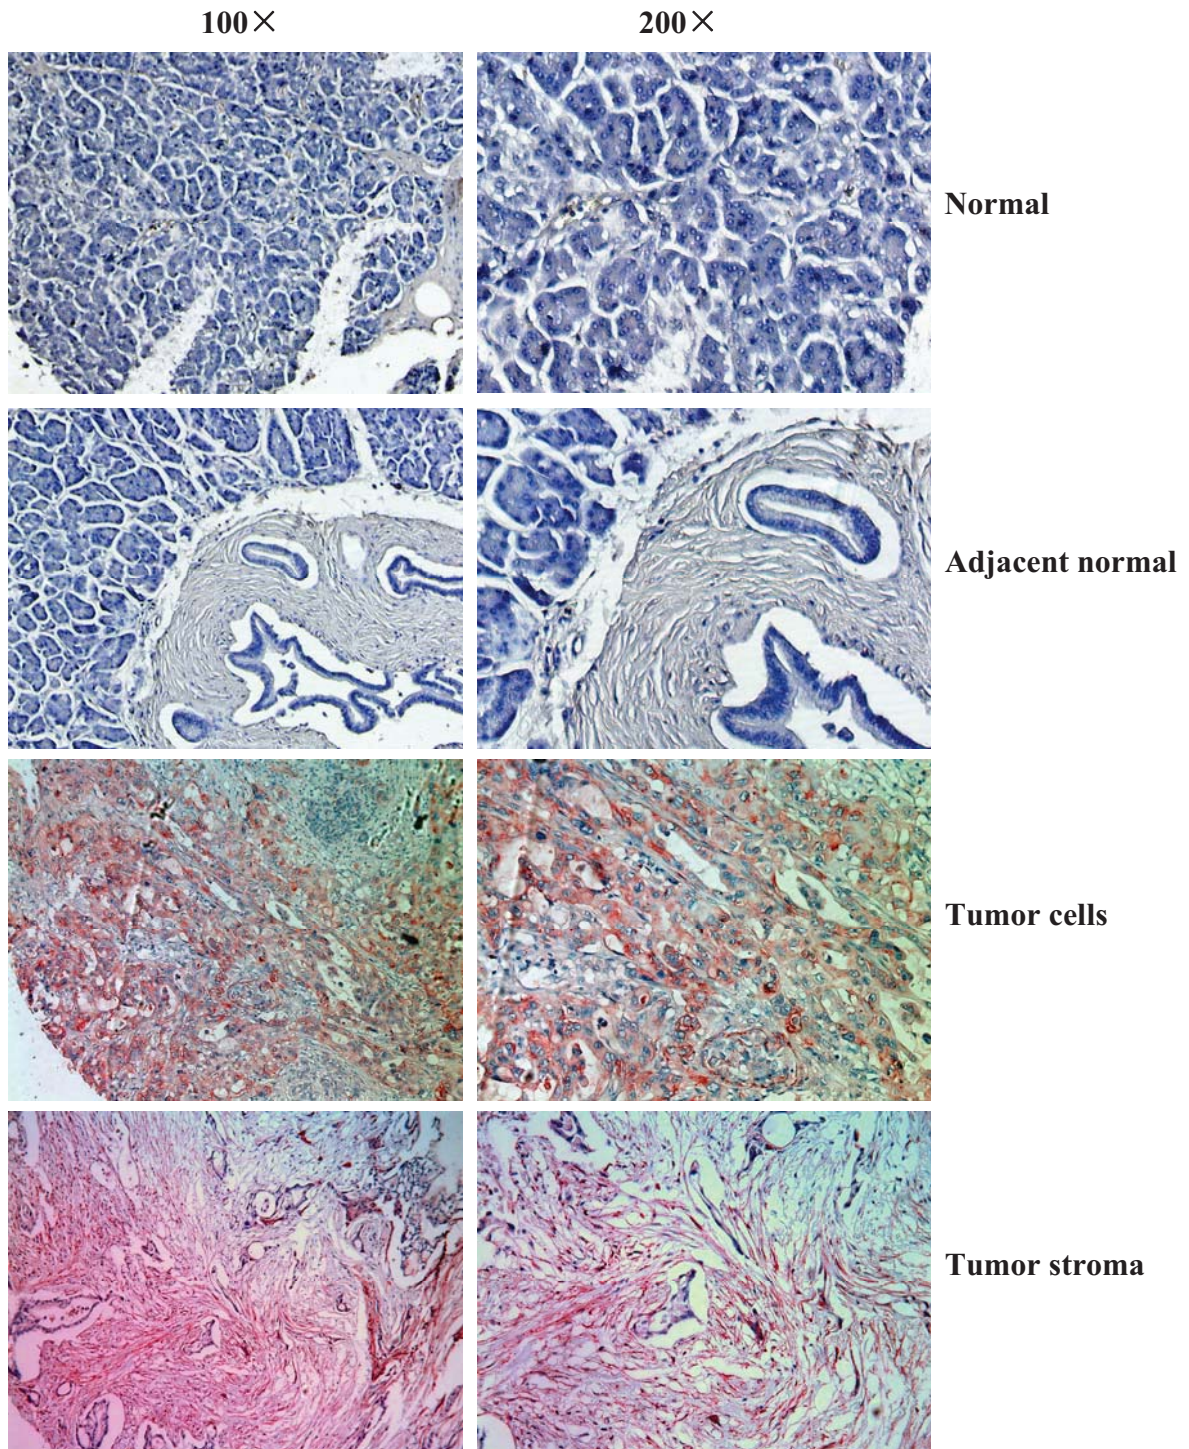

**Supplementary Fig. 2.** Representative photos of Cav-1 protein expression in normal pancreatic tissue, adjacent normal pancreatic tissue, tumor cells and tumor stroma were shown at both lower and higher magnifications, respectively.

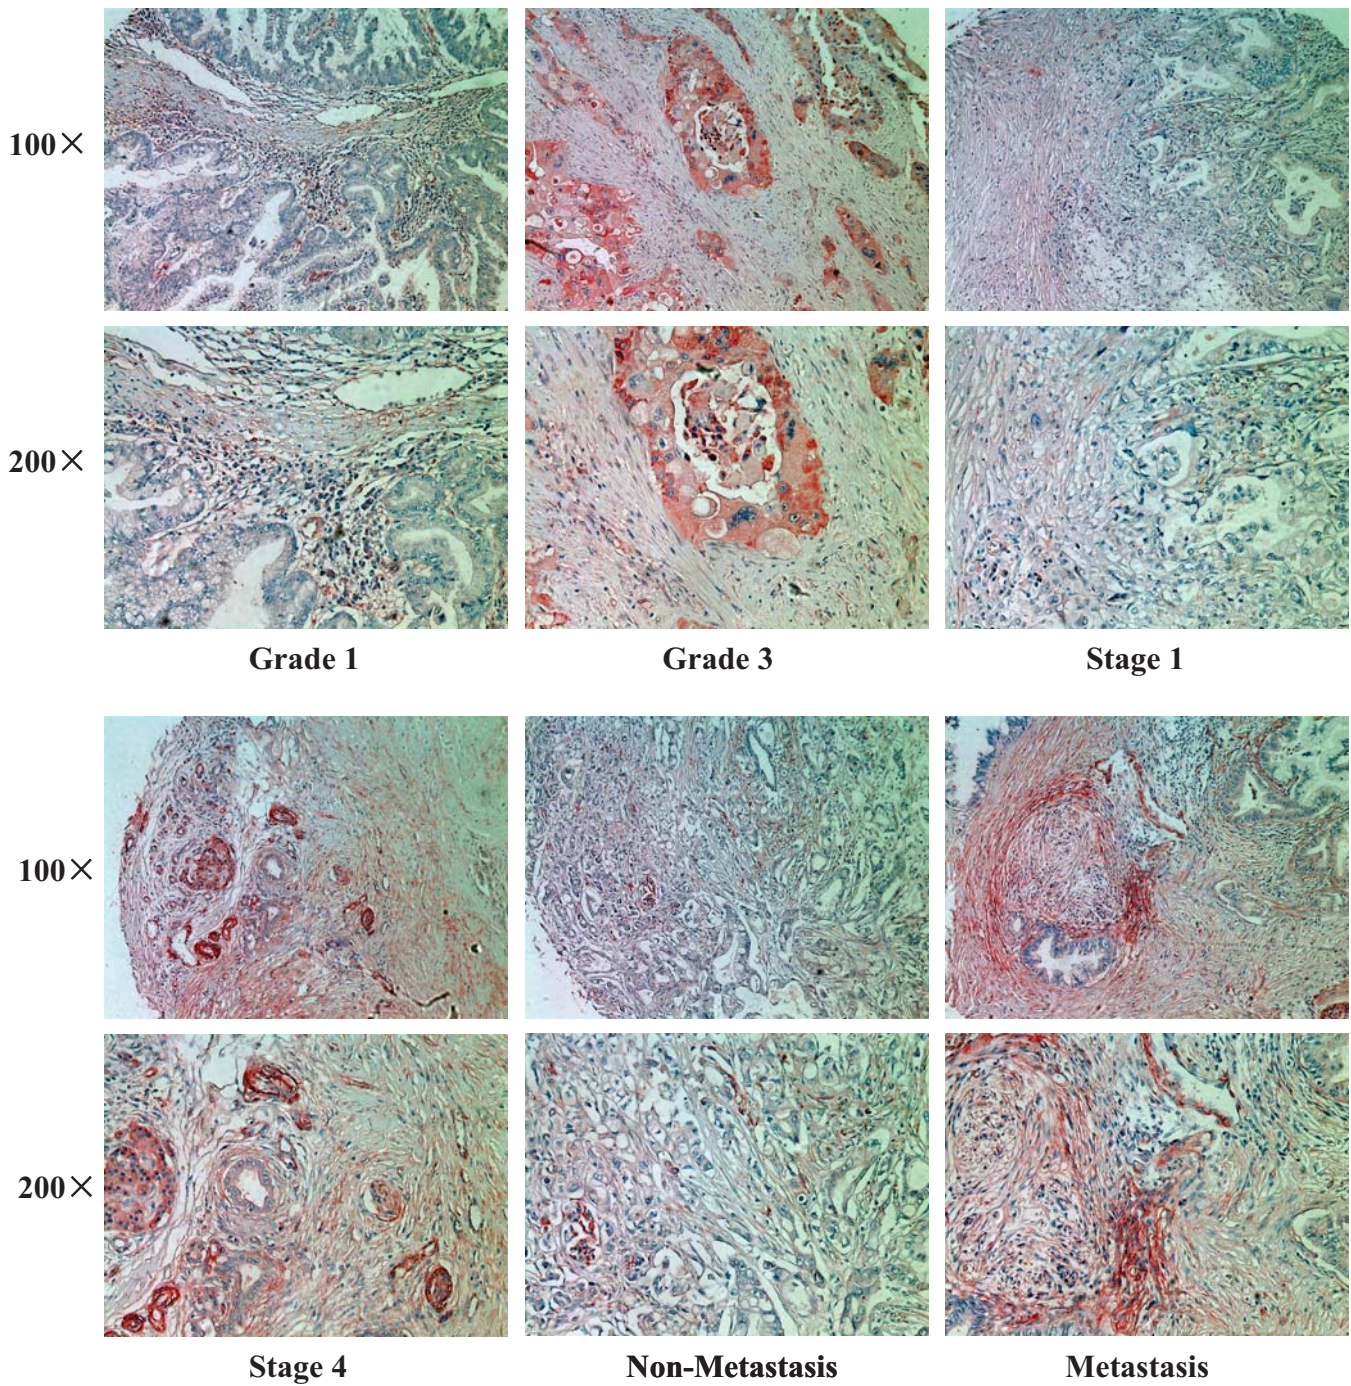

**Supplementary Fig. 3.** Representative photos of Cav-1 protein expression in Grade 1 and 3 , Stage 1 and 4, non-metastasis and metastasis were shown at both lower and higher magnifications, respectively.

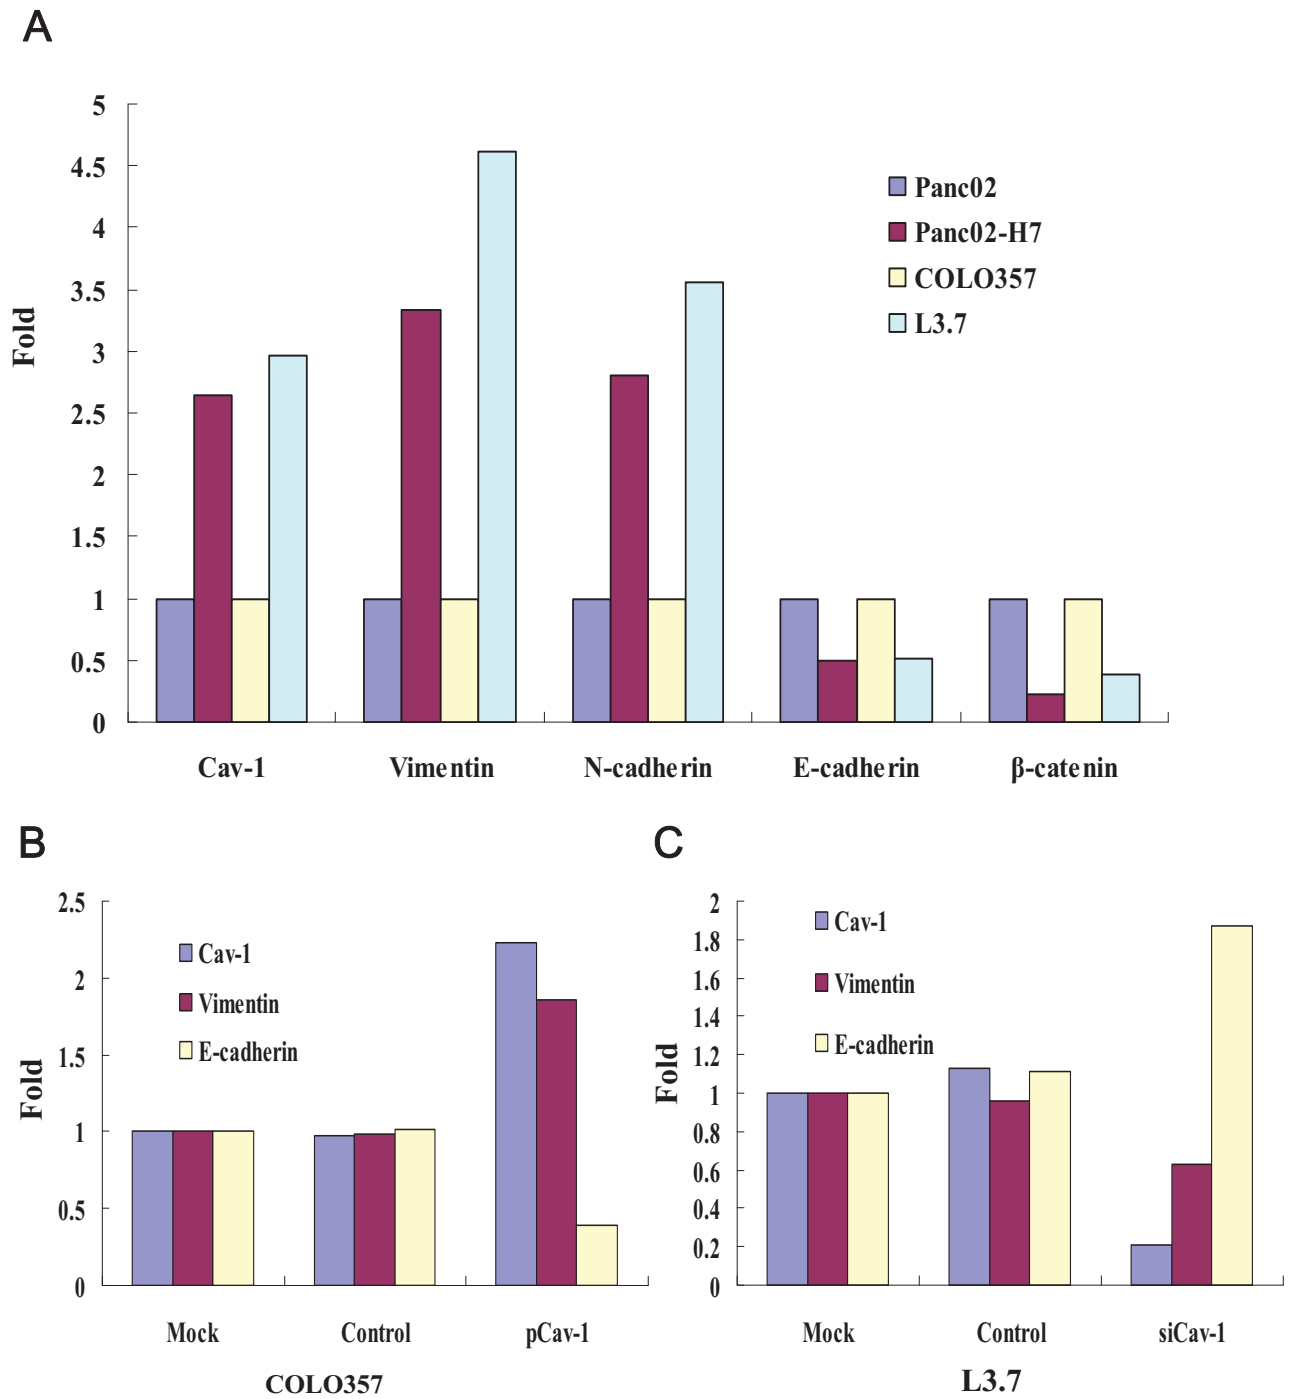

**Supplementary Fig. 4.** Densitometric analysis of gene expression and standardization to GAPDH  
**A**, Western blot quantitative results of Fig. 2D, and fold change of Panc02 and COLO357, respectively; **B & C**, Western blot quantitative results of Fig. 3C, and fold change of Mock group.

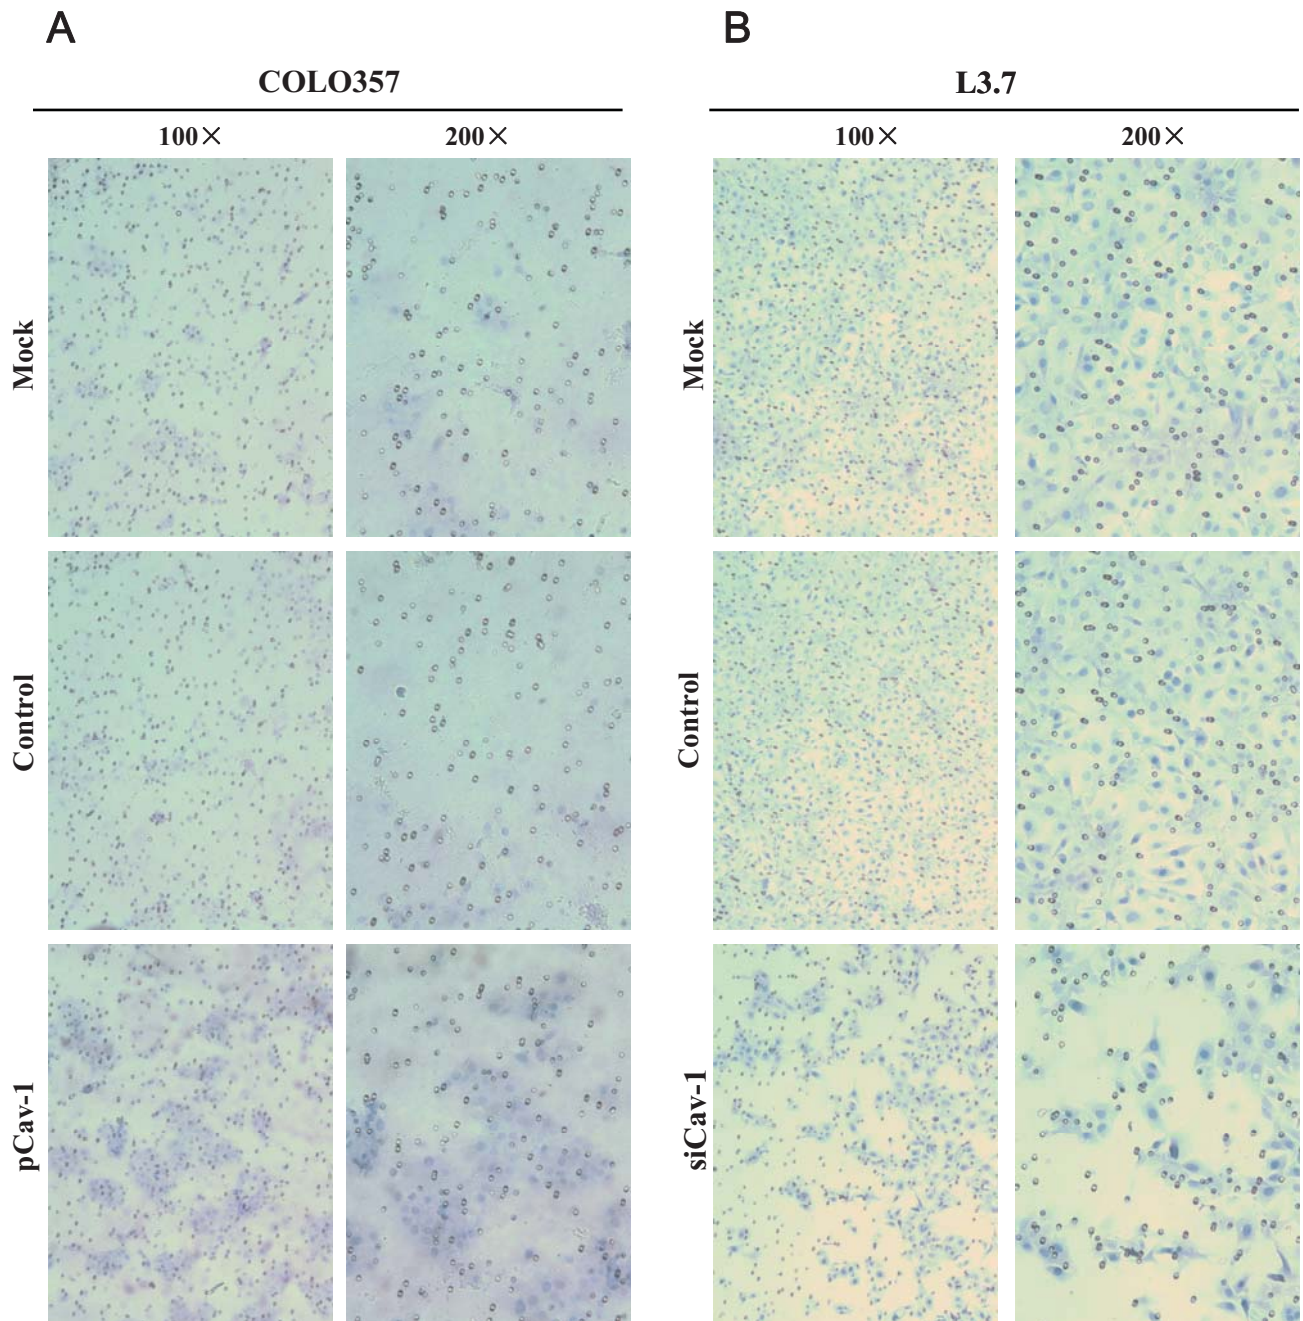

**Supplementary Fig. 5.** COLO357 (**A** panels) and L3.7 cells (**B** panels) were transfected with pcDNA3.1-Cav-1 and Cav-1 siRNA for 48 h, respectively. Representative tumor cells migrated through a membrane were photographed at both lower and higher magnifications, respectively.

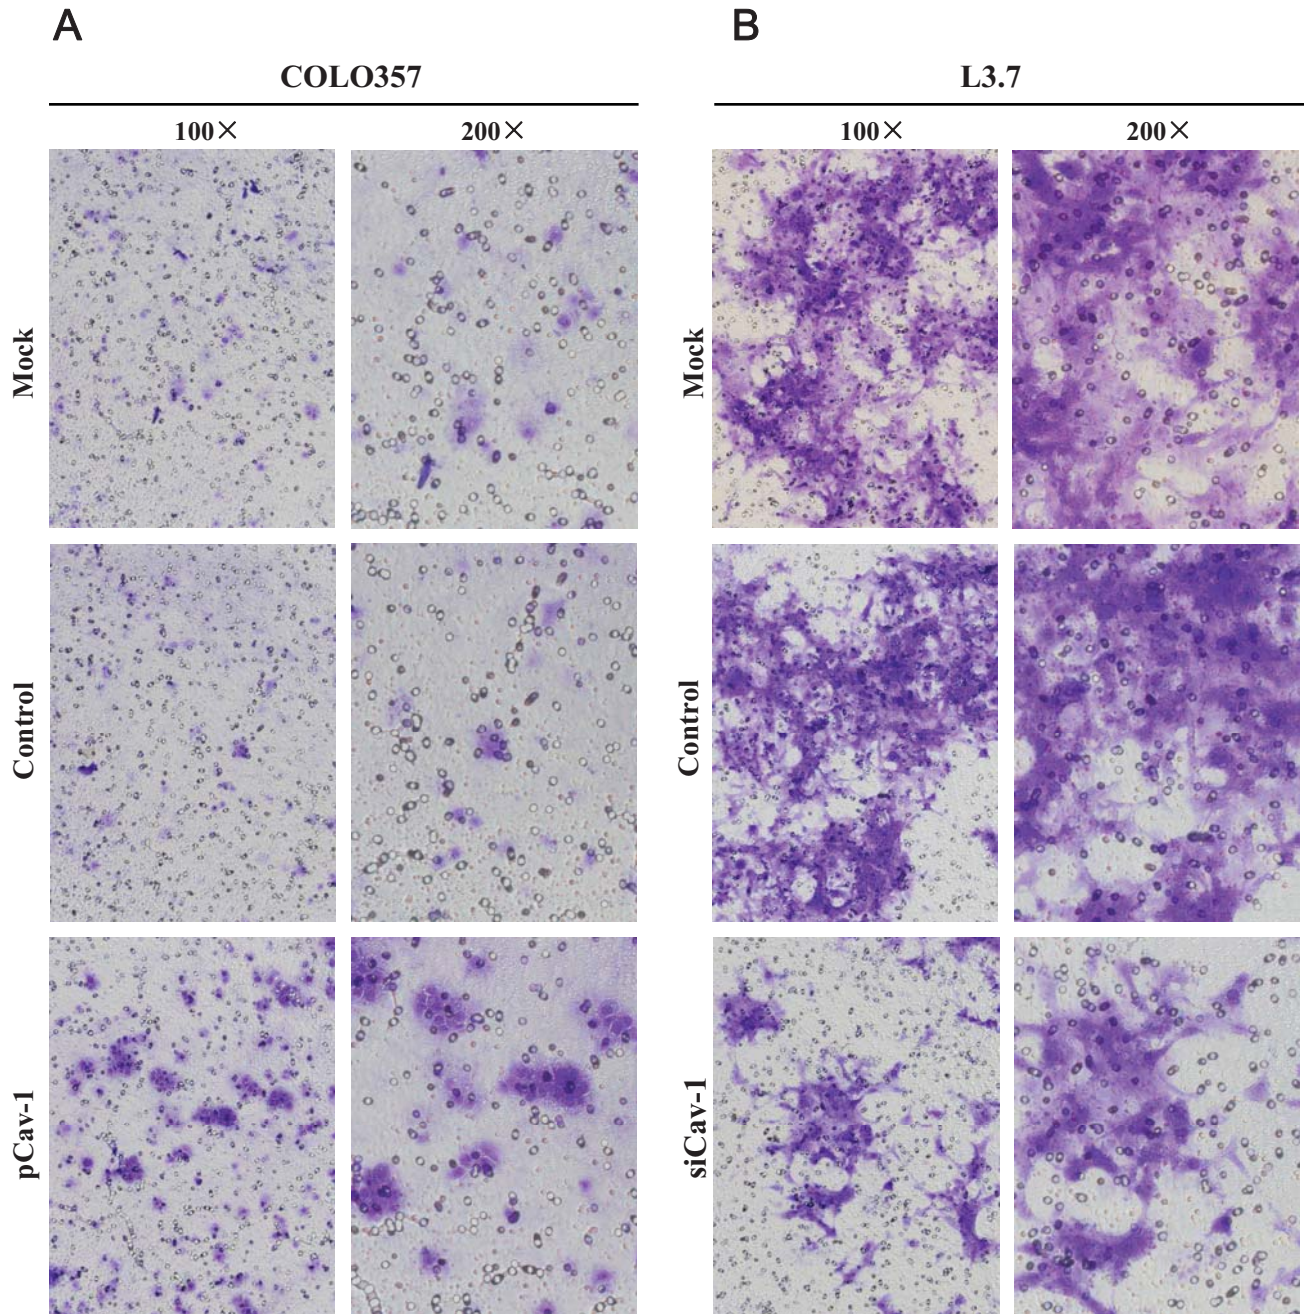

**Supplementary Fig. 6.** COLO357 (**A** panels) and L3.7 cells (**B** panels) were transfected with pcDNA3.1-Cav-1 and Cav-1 siRNA for 48 h, respectively. Representative tumor cells invaded through Matrigel were photographed at both lower and higher magnifications, respectively.

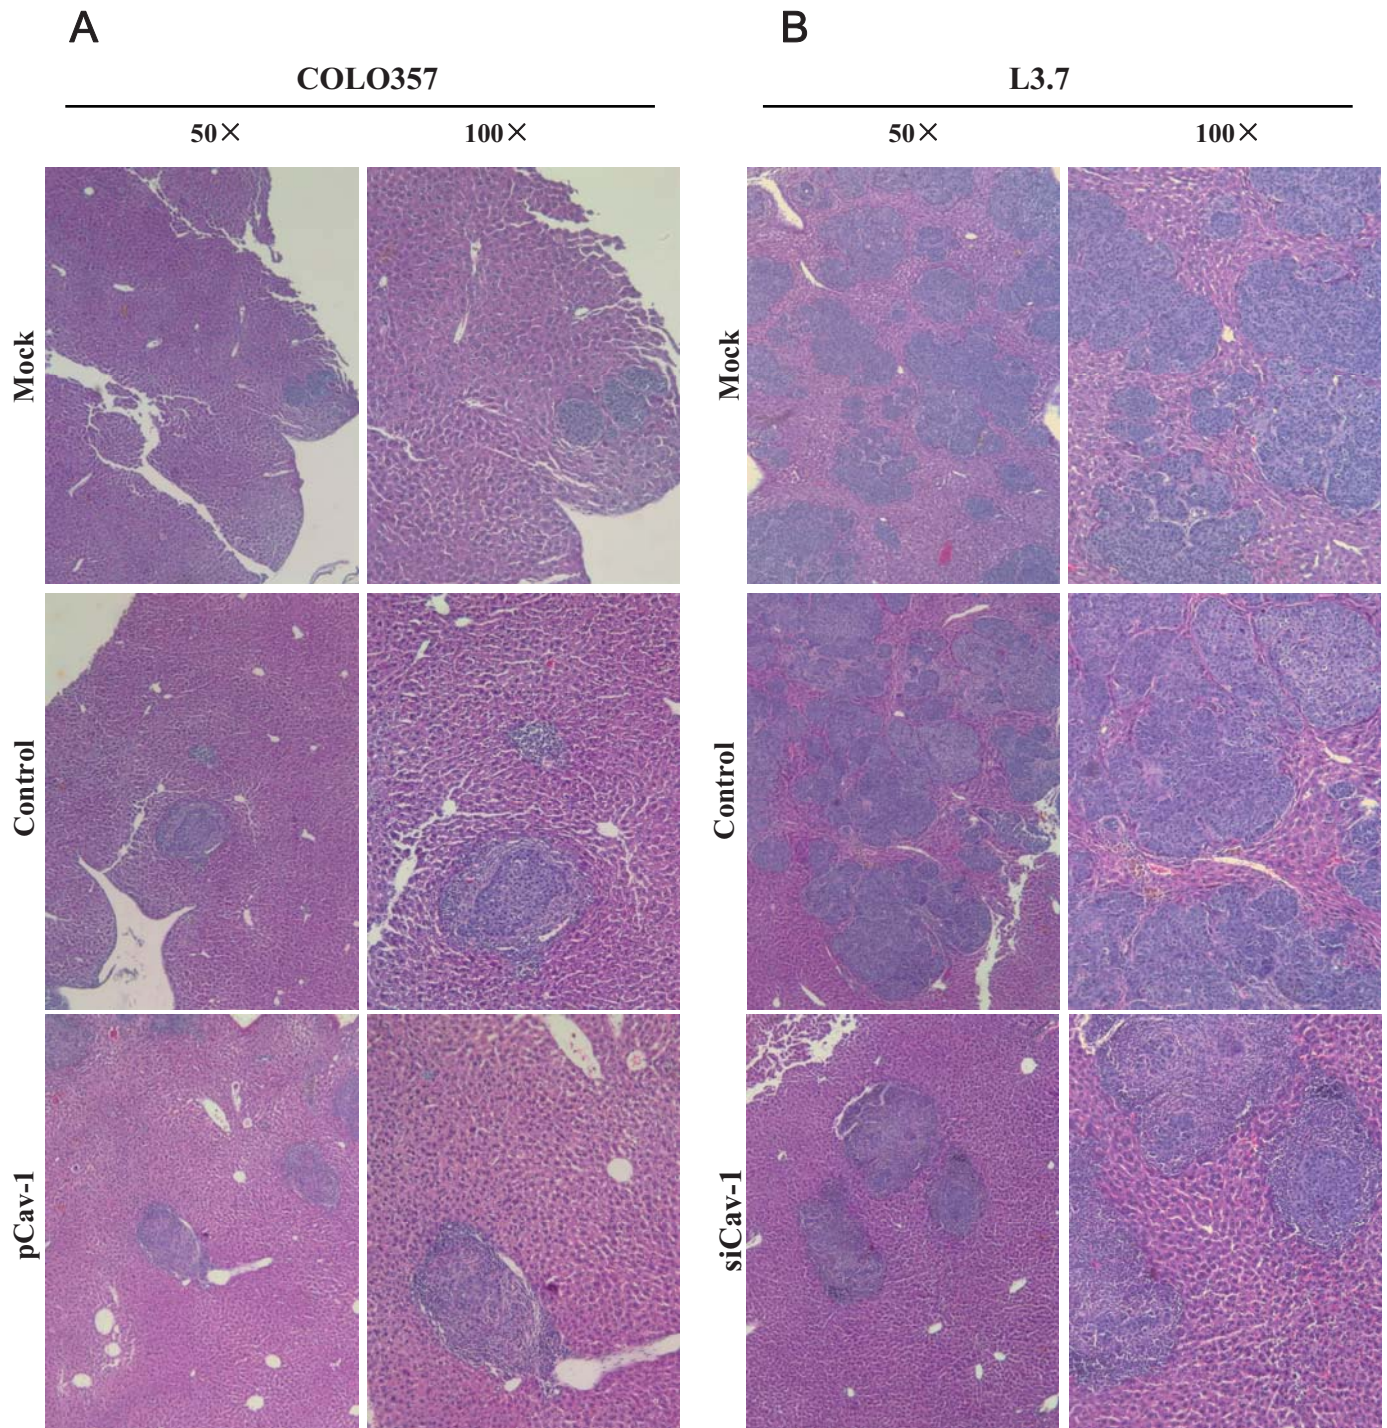

**Supplementary Fig. 7.** Representative photos of H&E staining of liver metastasis by COLO357 (**A** panels) and L3.7 cells (**B** panels) were taken at both lower and higher magnifications, respectively.
